# Supplementary material
Source: PubMed Central journal article supplement (PMC4834069)
Supplement: NIHMS731163-supplement-Supp_TableS1-S5___FigureS1-S3.pdf [file NIHMS731163-supplement-Supp_TableS1-S5___FigureS1-S3.pdf]

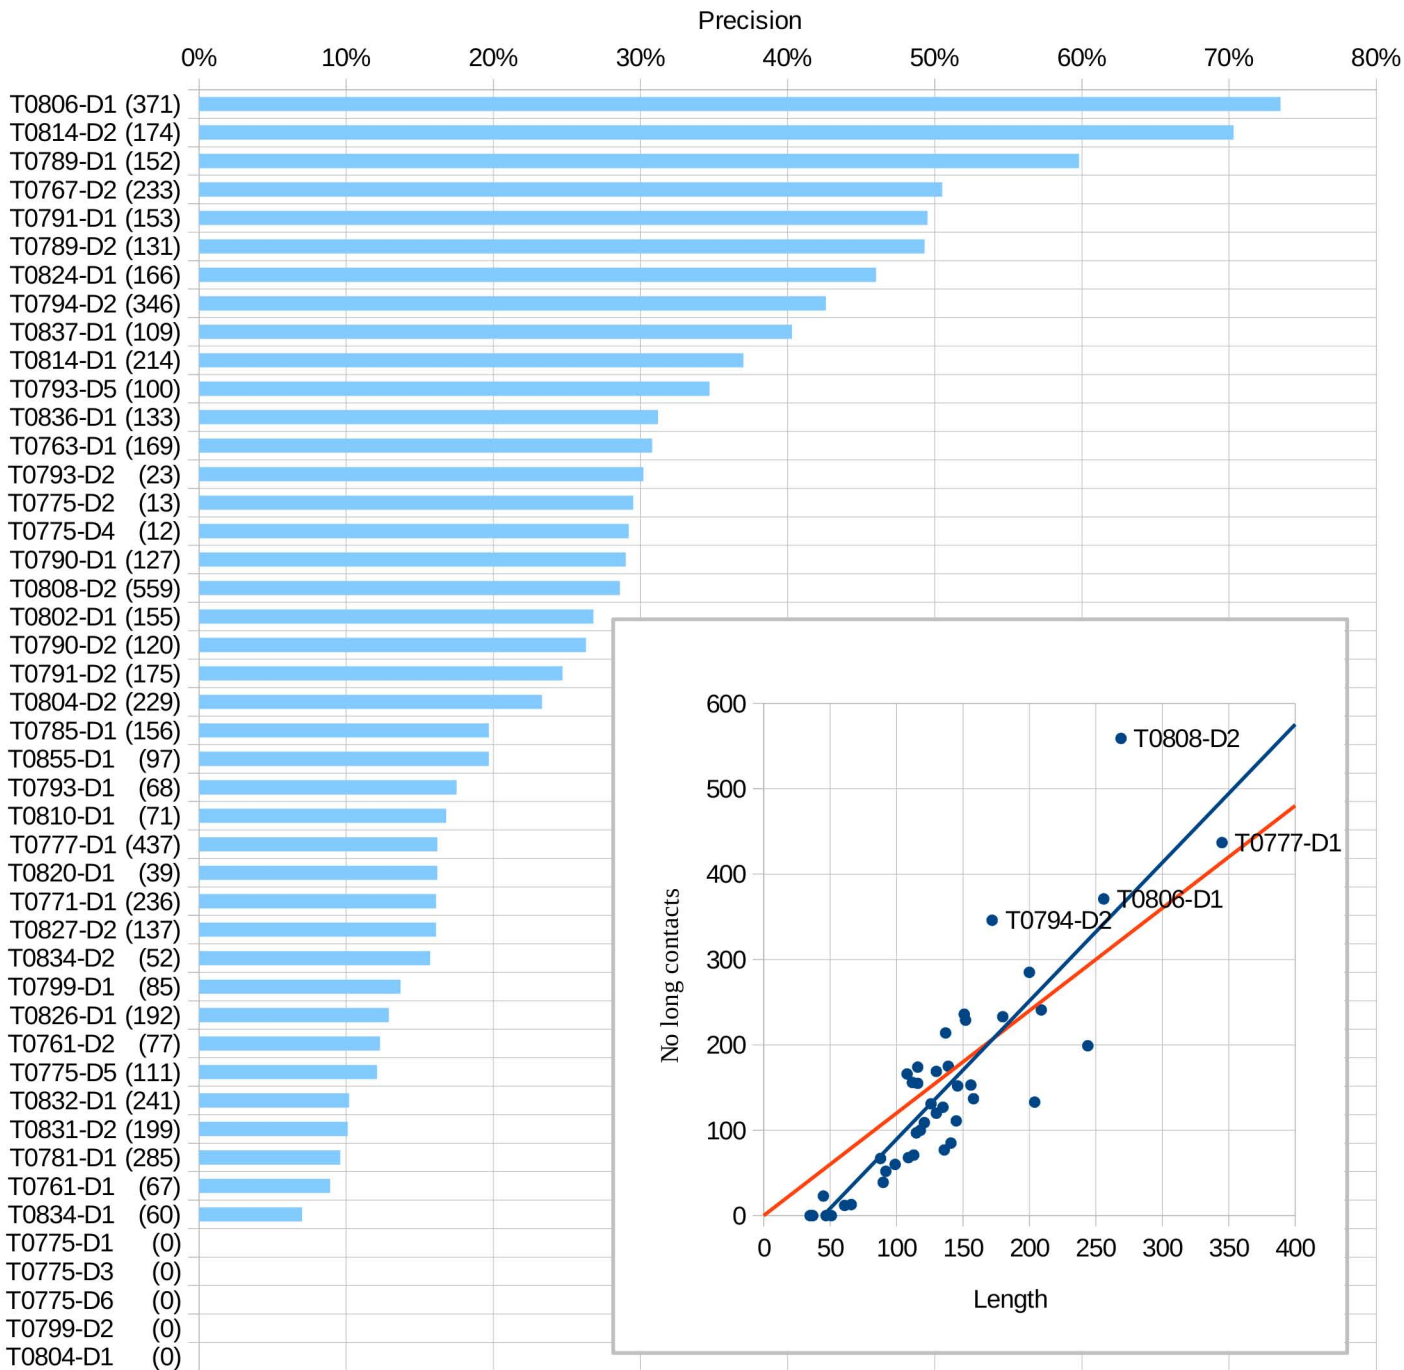

### Color Key

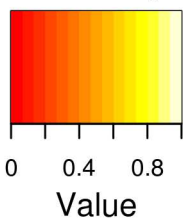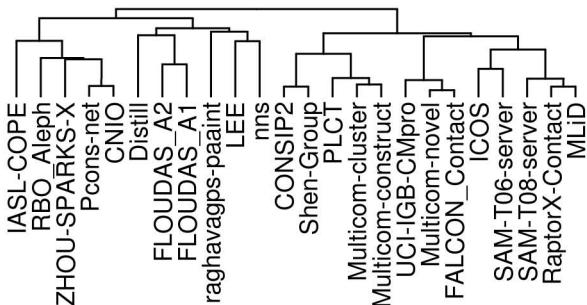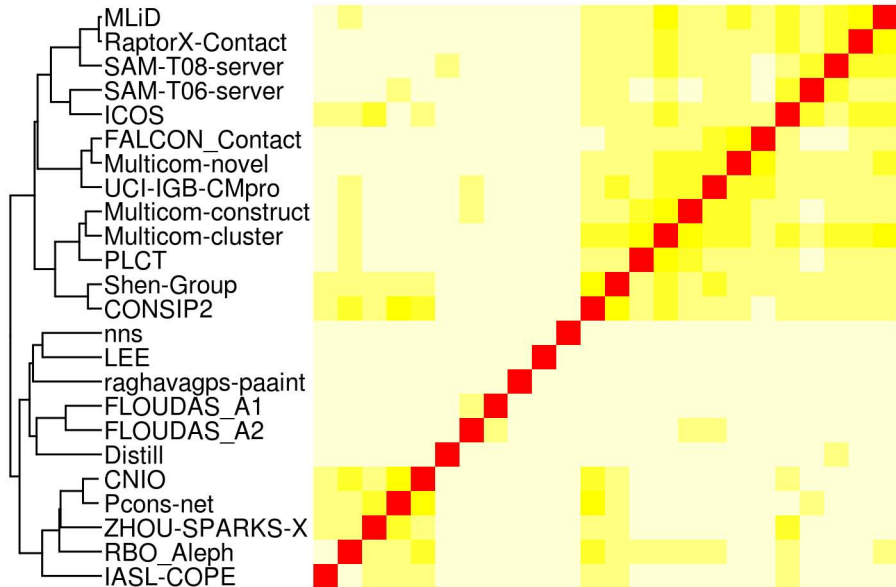

■ FM ■ FM, TBM-hard

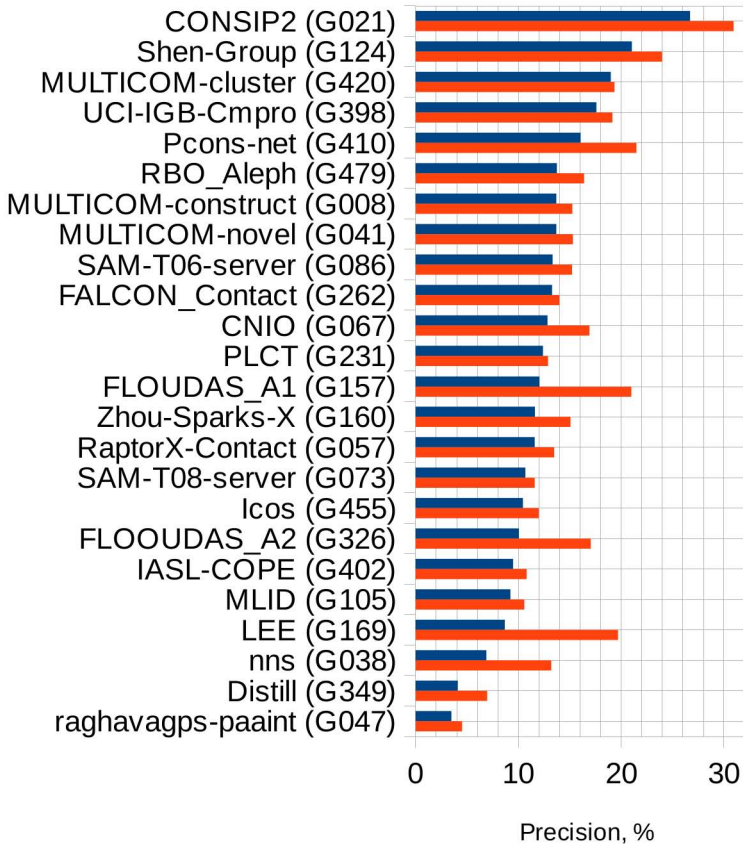

Table S1. Results of the paired two-tailed Student's tests for top 12 CASP11 contact predictors according to the  $X_d$  score on the FM set.

|      | G021   | G420  | G124  | G057  | G086  | G073  | G398  | G479  | G455  | G008  | G231  | G041 |
|------|--------|-------|-------|-------|-------|-------|-------|-------|-------|-------|-------|------|
| G021 | -      | 37    | 35    | 40    | 26    | 29    | 40    | 36    | 39    | 39    | 36    | 38   |
| G420 | 0.085  | -     | 32    | 37    | 26    | 29    | 37    | 33    | 36    | 36    | 35    | 35   |
| G124 | 0.154  | 0.770 | -     | 35    | 22    | 25    | 35    | 33    | 34    | 34    | 33    | 33   |
| G057 | 0.019  | 0.162 | 0.610 | -     | 26    | 29    | 40    | 36    | 39    | 39    | 36    | 38   |
| G086 | 0.002  | 0.016 | 0.083 | 0.068 | -     | 26    | 26    | 22    | 25    | 26    | 24    | 25   |
| G073 | 0.002  | 0.002 | 0.095 | 0.046 | 0.941 | -     | 29    | 25    | 28    | 29    | 27    | 27   |
| G398 | 0.003  | 0.107 | 0.403 | 0.418 | 0.915 | 0.730 | -     | 36    | 39    | 39    | 36    | 38   |
| G479 | 0.023  | 0.280 | 0.329 | 0.317 | 0.675 | 0.836 | 0.964 | -     | 35    | 35    | 32    | 34   |
| G455 | <0.001 | 0.001 | 0.030 | 0.039 | 0.948 | 0.844 | 0.839 | 0.826 | -     | 38    | 35    | 37   |
| G008 | 0.001  | 0.010 | 0.121 | 0.135 | 0.902 | 0.797 | 0.592 | 0.497 | 0.856 | -     | 35    | 37   |
| G231 | <0.001 | 0.002 | 0.038 | 0.054 | 0.469 | 0.689 | 0.345 | 0.424 | 0.884 | 0.571 | -     | 34   |
| G041 | <0.001 | 0.001 | 0.003 | 0.009 | 0.439 | 0.415 | 0.259 | 0.293 | 0.210 | 0.661 | 0.646 | -    |

The below the diagonal part of the table displays the t-test probability  $p$  that the observed differences in the results are due to chance. The above the diagonal part of the table shows the numbers of common domains (out of 40 max in the RL analysis). Cells corresponding to the statistically similar pairs of groups at the confidence level of 95% ( $p > 0.05$ ) are shaded grey.

Table S2. Head-to-head comparisons of the top 12 groups according to the *Xd* score on the FM domain set.

|      | G021   | G420   | G124   | G057   | G086   | G073   | G398   | G479   | G455   | G008   | G231   | G041   |
|------|--------|--------|--------|--------|--------|--------|--------|--------|--------|--------|--------|--------|
| G021 | -      | 62.16% | 65.71% | 65.00% | 73.08% | 79.31% | 70.00% | 58.33% | 76.92% | 74.36% | 69.44% | 76.32% |
| G420 | 37.84% | -      | 56.25% | 59.46% | 69.23% | 72.41% | 59.46% | 66.67% | 77.78% | 69.44% | 71.43% | 80.00% |
| G124 | 34.29% | 43.75% | -      | 54.29% | 63.64% | 64.00% | 57.14% | 51.52% | 64.71% | 58.82% | 63.64% | 75.76% |
| G057 | 32.50% | 40.54% | 45.71% | -      | 53.85% | 58.62% | 55.00% | 63.89% | 56.41% | 61.54% | 61.11% | 63.16% |
| G086 | 26.92% | 30.77% | 36.36% | 46.15% | -      | 53.85% | 50.00% | 54.55% | 44.00% | 46.15% | 54.17% | 52.00% |
| G073 | 20.69% | 27.59% | 36.00% | 37.93% | 46.15% | -      | 37.93% | 52.00% | 46.43% | 44.83% | 59.26% | 59.26% |
| G398 | 27.50% | 40.54% | 42.86% | 45.00% | 50.00% | 62.07% | -      | 50.00% | 58.97% | 51.28% | 50.00% | 60.53% |
| G479 | 38.89% | 33.33% | 48.48% | 36.11% | 45.45% | 48.00% | 50.00% | -      | 60.00% | 65.71% | 59.38% | 61.76% |
| G455 | 20.51% | 22.22% | 35.29% | 43.59% | 56.00% | 53.57% | 41.03% | 40.00% | -      | 47.37% | 48.57% | 62.16% |
| G008 | 25.64% | 30.56% | 41.18% | 38.46% | 53.85% | 55.17% | 48.72% | 34.29% | 52.63% | -      | 57.14% | 62.16% |
| G231 | 30.56% | 25.71% | 36.36% | 38.89% | 45.83% | 40.74% | 47.22% | 40.63% | 51.43% | 42.86% | -      | 52.94% |
| G041 | 23.68% | 20.00% | 24.24% | 36.84% | 48.00% | 40.74% | 36.84% | 38.24% | 37.84% | 37.84% | 47.06% | -      |

Each cell displays the percentage of common domains for which a group in the row has a higher score than the group in the column. Numbers for the same pair of groups on both sides of the diagonal may not add to 100% as ties are not counted.

Table S3. Results of the paired two-tailed Student's tests for top 12 CASP11 contact predictors according to the MCC score on the FM set.

|      | G420   | G021  | G086  | G008  | G105   | G073  | G455  | G398  | G057  | G169  | G124  | G157 |
|------|--------|-------|-------|-------|--------|-------|-------|-------|-------|-------|-------|------|
| G420 | -      | 37    | 26    | 36    | 37     | 29    | 36    | 37    | 37    | 27    | 32    | 26   |
| G021 | 0.491  | -     | 26    | 39    | 40     | 29    | 39    | 40    | 40    | 30    | 35    | 29   |
| G086 | 0.077  | 0.460 | -     | 26    | 26     | 26    | 25    | 26    | 26    | 19    | 22    | 20   |
| G008 | 0.010  | 0.217 | 0.962 | -     | 39     | 29    | 38    | 39    | 39    | 30    | 34    | 29   |
| G105 | 0.002  | 0.327 | 0.931 | 0.970 | -      | 29    | 39    | 40    | 40    | 30    | 35    | 29   |
| G073 | <0.001 | 0.186 | 0.278 | 0.653 | 0.479  | -     | 28    | 29    | 29    | 21    | 25    | 21   |
| G455 | <0.001 | 0.068 | 0.048 | 0.264 | 0.128  | 0.064 | -     | 39    | 39    | 29    | 34    | 28   |
| G398 | 0.002  | 0.031 | 0.069 | 0.059 | 0.111  | 0.070 | 0.448 | -     | 40    | 30    | 35    | 29   |
| G057 | <0.001 | 0.025 | 0.094 | 0.023 | <0.001 | 0.069 | 0.151 | 0.884 | -     | 30    | 35    | 29   |
| G169 | 0.001  | 0.086 | 0.101 | 0.038 | 0.031  | 0.025 | 0.227 | 0.257 | 0.566 | -     | 30    | 26   |
| G124 | 0.010  | 0.101 | 0.609 | 0.067 | 0.167  | 0.471 | 0.566 | 0.544 | 0.799 | 0.905 | -     | 29   |
| G157 | 0.019  | 0.075 | 0.471 | 0.093 | 0.122  | 0.367 | 0.365 | 0.398 | 0.631 | 0.979 | 0.661 | -    |

The below the diagonal part of the table displays the t-test probability  $p$  that the observed differences in the results are due to chance. The above the diagonal part of the table shows the numbers of common domains (out of 40 max in the RL analysis). Cells corresponding to the statistically similar pairs of groups at the confidence level of 95% ( $p > 0.05$ ) are shaded grey.

Table S4. Head-to-head comparisons of the top 12 groups according to the MCC score on the FM domain set.

|      | G420   | G021   | G086   | G008   | G105   | G073   | G455   | G398   | G057   | G169   | G124   | G157   |
|------|--------|--------|--------|--------|--------|--------|--------|--------|--------|--------|--------|--------|
| G420 | -      | 62.16% | 53.85% | 80.56% | 72.97% | 82.76% | 75.00% | 75.68% | 83.78% | 88.89% | 84.38% | 92.31% |
| G021 | 37.84% | -      | 42.31% | 53.85% | 40.00% | 51.72% | 53.85% | 52.50% | 57.50% | 53.33% | 65.71% | 58.62% |
| G086 | 46.15% | 57.69% | -      | 65.38% | 61.54% | 53.85% | 56.00% | 73.08% | 69.23% | 78.95% | 77.27% | 75.00% |
| G008 | 19.44% | 46.15% | 34.62% | -      | 43.59% | 44.83% | 55.26% | 56.41% | 69.23% | 70.00% | 70.59% | 75.86% |
| G105 | 27.03% | 60.00% | 38.46% | 56.41% | -      | 58.62% | 58.97% | 65.00% | 70.00% | 76.67% | 68.57% | 79.31% |
| G073 | 17.24% | 48.28% | 46.15% | 55.17% | 41.38% | -      | 64.29% | 58.62% | 79.31% | 80.95% | 72.00% | 85.71% |
| G455 | 25.00% | 46.15% | 44.00% | 44.74% | 41.03% | 32.14% | -      | 56.41% | 53.85% | 68.97% | 64.71% | 67.86% |
| G398 | 24.32% | 25.00% | 26.92% | 43.59% | 35.00% | 41.38% | 43.59% | -      | 42.50% | 60.00% | 57.14% | 65.52% |
| G057 | 16.22% | 37.50% | 30.77% | 30.77% | 30.00% | 20.69% | 46.15% | 52.50% | -      | 66.67% | 54.29% | 79.31% |
| G169 | 11.11% | 43.33% | 21.05% | 30.00% | 23.33% | 19.05% | 31.03% | 40.00% | 33.33% | -      | 53.33% | 61.54% |
| G124 | 15.63% | 22.86% | 22.73% | 29.41% | 28.57% | 28.00% | 35.29% | 25.71% | 40.00% | 46.67% | -      | 44.83% |
| G157 | 7.69%  | 31.03% | 25.00% | 24.14% | 17.24% | 14.29% | 32.14% | 20.69% | 17.24% | 38.46% | 37.93% | -      |

Each cell displays the percentage of common domains for which a group in the row has a higher score than the group in the column. Numbers for the same pair of groups on both sides of the diagonal may not add to 100% as ties are not counted.

Table S5. The results of inter-domain contact analysis.

| GROUPS                    | FP   | TP | Prec, % |
|---------------------------|------|----|---------|
| FLOUDAS_A1 (G157)         | 579  | 36 | 5.9     |
| FLOUDAS_A3 (G235)         | 218  | 10 | 4.4     |
| CONSHIP2 (G021)           | 1056 | 44 | 4       |
| myprotein-me (G216)       | 504  | 16 | 3.1     |
| SAM-T08-server (G073)     | 709  | 23 | 3.1     |
| Shen-Group (G124)         | 995  | 27 | 2.6     |
| MULTICOM-novel (G041)     | 1034 | 27 | 2.5     |
| Pcons-net (G410)          | 1060 | 21 | 1.9     |
| FLOUDAS_A2 (G326)         | 613  | 10 | 1.6     |
| MULTICOM-cluster (G420)   | 938  | 13 | 1.4     |
| RBO_Aleph (G479)          | 1016 | 13 | 1.3     |
| FALCON_Contact (G262)     | 1145 | 13 | 1.1     |
| IASL-COPE (G402)          | 849  | 9  | 1       |
| Distill (G349)            | 871  | 9  | 1       |
| PLCT (G231)               | 892  | 8  | 0.9     |
| MLID (G105)               | 985  | 9  | 0.9     |
| MULTICOM-construct (G008) | 978  | 9  | 0.9     |
| Icos (G455)               | 958  | 8  | 0.8     |
| LEE (G169)                | 784  | 4  | 0.5     |
| SAM-T06-server (G086)     | 734  | 4  | 0.5     |
| RBO-human (G287)          | 260  | 1  | 0.4     |
| CNIO (G067)               | 949  | 4  | 0.4     |
| nns (G038)                | 977  | 4  | 0.4     |
| UCI-IGB-Cmpro (G398)      | 1155 | 3  | 0.3     |
| RaptorX-Contact (G057)    | 1155 | 3  | 0.3     |
| Zhou-Sparks-X (G160)      | 593  | 1  | 0.2     |
| Raghavagps-paint (G047)   | 982  | 1  | 0.1     |
| eThread (G454)            | 568  | 0  | 0       |
| FoDTcm (G283)             | 570  | 0  | 0       |
